# Supplementary material for: Study protocol for a group randomized controlled trial of a classroom-based intervention aimed at preventing early risk factors for drug abuse: integrating effectiveness and implementation research
Source: PubMed Central journal article supplement (PMC2753630; doi:10.1186/1748-5908-4-56), 2009-09-02

Initial Random Assignment August 2004

Random assignment and design status from initial assignment through baseline assessments

Random assignment and design status post-baseline through end of 1<sup>st</sup> grade

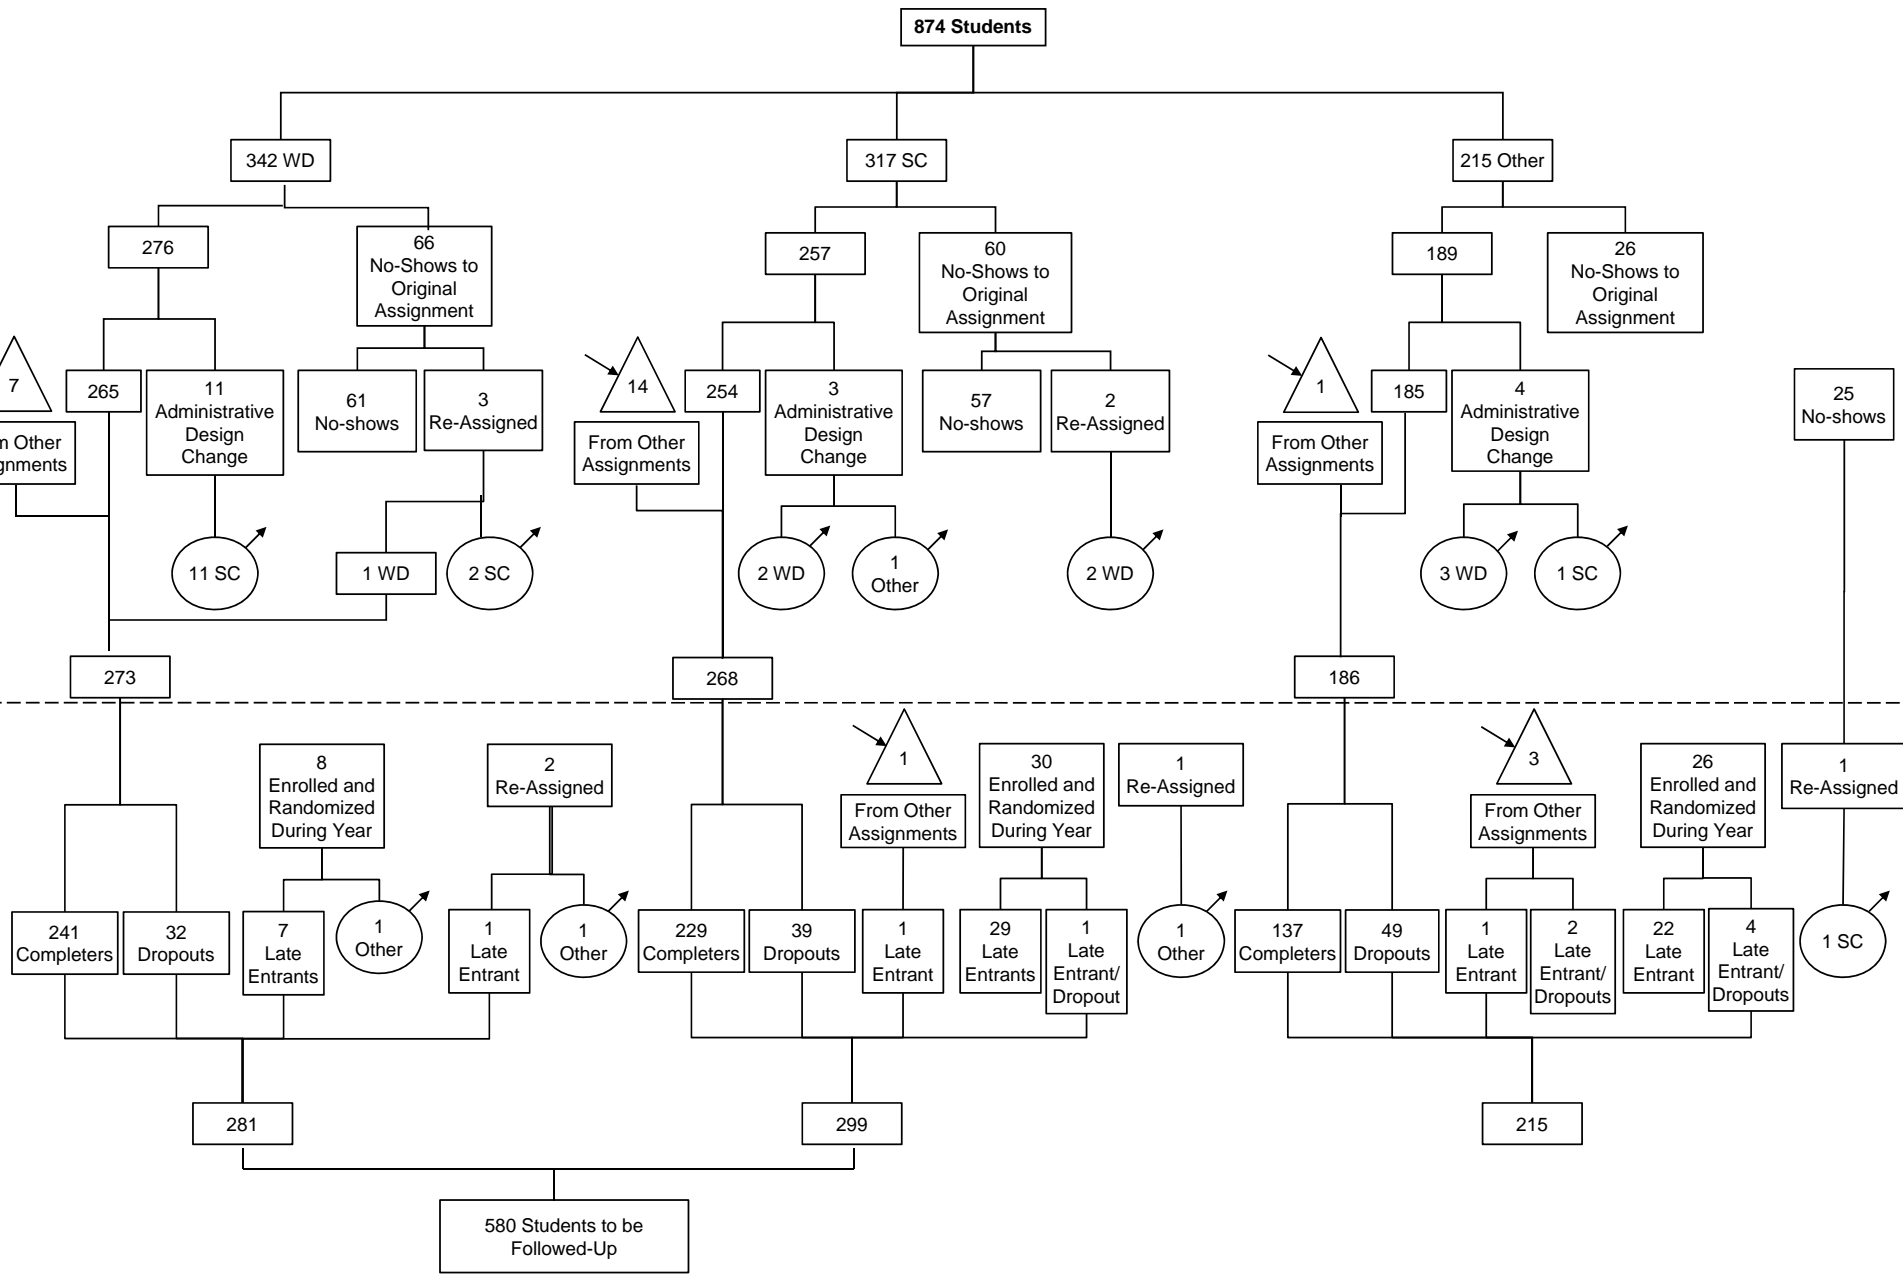

Supplement: 1748-5908-4-56-S2.pdf [file 1748-5908-4-56-S2.pdf]
